# Supplementary material
Source: HighWire-hosted journal article supplement (https://cmajopen.ca/highwire/filestream/81096/field_highwire_adjunct_files/0/2017-0161-1-at.pdf)
Supplement: 2017-0161-1-at.pdf [file 2017-0161-1-at.pdf]

## Appendix 1 (as supplied by the authors): Oral systemic therapy drugs

|                  |                     |              |
|------------------|---------------------|--------------|
| abiraterone      | etoposide           | nilotinib    |
| acitretin        | everolimus          | nilutamide   |
| anagrelide       | exemestane          | pazopanib    |
| anastrozole      | fludarabine         | prednisolone |
| bicalutamide     | flutamide           | prednisone   |
| bromocriptine    | gefitinib           | procarbazine |
| busulfan         | hydroxyurea         | quinagolide  |
| cabergoline      | imatinib            | ruxolitinib  |
| capecitabine     | isotretinoin        | sorafenib    |
| chlorambucil     | lapatinib           | sunitinib    |
| clodronate       | lenalidomide        | tamoxifen    |
| crizotinib       | letrozole           | temozolomide |
| cyclophosphamide | lomustine           | thalidomide  |
| cyclosporine     | medroxyprogesterone | thioguanine  |
| cyproterone      | megestrol           | tretinoin    |
| dasatinib        | melphalan           | vemurafenib  |
| enzalutamide     | mercaptopurine      | vismodegib   |
| erlotinib        | methotrexate        |              |
| estramustine     | mitotane            |              |
